# Supplementary material
Source: PubMed Central journal article supplement (PMC4539956)
Supplement: NIHMS711760-supplement-Supplement1.pdf [file NIHMS711760-supplement-Supplement1.pdf]

## Supplementary Appendix

This appendix has been provided by the authors to give readers additional information about their work.

Supplement to: Nishino M, Sholl LM, Hodi FS, et al. Anti-PD-1-related pneumonitis during cancer immunotherapy. *N Engl J Med* 2015;373:288-90. DOI: 10.1056/NEJMc1505197

## **Supplementary Appendix**

Table of Contents

Table S1. Patient characteristics and clinical course of the 3 cases of anti-PD-1 antibody-related pneumonitis

Table S2. Imaging characteristics of the 3 cases of anti-PD-1 antibody-related pneumonitis

Table S1. Patient characteristics and clinical course of the 3 cases of anti-PD-1 antibody-related pneumonitis

|                                      | <b>PATIENT 1</b>                                                                   | <b>PATIENT 2</b>                                                    | <b>PATIENT 3</b>                                                                              |
|--------------------------------------|------------------------------------------------------------------------------------|---------------------------------------------------------------------|-----------------------------------------------------------------------------------------------|
| <b>Age/Sex</b>                       | 70/Male                                                                            | 38/Female                                                           | 58/Male                                                                                       |
| <b>Trial phase</b>                   | II                                                                                 | III                                                                 | I                                                                                             |
| <b>Agent</b>                         | Nivolumab given sequentially with ipilimumab                                       | Nivolumab (3 mg/kg)                                                 | Nivolumab (1 mg/kg)                                                                           |
| <b>Doses given before onset</b>      | 6 doses of nivolumab (3 mg/kg) followed by 3 doses of ipilimumab (3 mg/kg)         | 6 doses of nivolumab (3 mg/kg)                                      | 4 doses of nivolumab (1 mg/kg)                                                                |
| <b>Onset since therapy start</b>     | 24.3 weeks                                                                         | 15.3 weeks                                                          | 7.4 weeks                                                                                     |
| <b>Toxicity grade of pneumonitis</b> | 3                                                                                  | 3                                                                   | 2                                                                                             |
| <b>Respiratory symptoms</b>          | Cough, shortness of breath, hypoxia, subacute fever                                | Dyspnea, hypoxia                                                    | Cough with deep inspiration                                                                   |
| <b>Treatment for pneumonitis</b>     | IV antibiotics, IV steroids, IV infliximab, requiring ICU admission and intubation | IV antibiotics, IV steroids, IV infliximab, requiring ICU admission | Oral steroid (Prednisone), No admission needed. Nivolumab held at dx, restarted after 8 weeks |
| <b>Outcome</b>                       | Alive, off trial                                                                   | Died                                                                | Alive, on trial without recurrent pneumonitis                                                 |

Table S2. Imaging characteristics of the 3 cases of anti-PD-1 antibody-related pneumonitis

| PATIENT 1                                                                                                                                                                                                                                                                                                                                                                                                                                    | PATIENT 2                                                                                                                                                                                                                                                                                                                                                                                                                                   | PATIENT 3                                                                                                                                                                                                                                                                                                                                                                                    |
|----------------------------------------------------------------------------------------------------------------------------------------------------------------------------------------------------------------------------------------------------------------------------------------------------------------------------------------------------------------------------------------------------------------------------------------------|---------------------------------------------------------------------------------------------------------------------------------------------------------------------------------------------------------------------------------------------------------------------------------------------------------------------------------------------------------------------------------------------------------------------------------------------|----------------------------------------------------------------------------------------------------------------------------------------------------------------------------------------------------------------------------------------------------------------------------------------------------------------------------------------------------------------------------------------------|
| <b>Baseline CT</b>                                                                                                                                                                                                                                                                                                                                                                                                                           |                                                                                                                                                                                                                                                                                                                                                                                                                                             |                                                                                                                                                                                                                                                                                                                                                                                              |
| No interstitial lung abnormalities                                                                                                                                                                                                                                                                                                                                                                                                           | Centrilobular emphysema and RB-ILD* in upper lungs                                                                                                                                                                                                                                                                                                                                                                                          | No interstitial lung abnormalities                                                                                                                                                                                                                                                                                                                                                           |
| <b>CT during therapy prior to diagnosis of pneumonitis</b>                                                                                                                                                                                                                                                                                                                                                                                   |                                                                                                                                                                                                                                                                                                                                                                                                                                             |                                                                                                                                                                                                                                                                                                                                                                                              |
| <b><u>2 weeks prior:</u></b><br>Peripheral consolidations, GGO, and reticular opacities in lower lungs (Fig.A)                                                                                                                                                                                                                                                                                                                               | <b><u>3 weeks prior:</u></b><br>No change since baseline, no finding suggestive of drug-related pneumonitis                                                                                                                                                                                                                                                                                                                                 | No CT between baseline and dx of pneumonitis                                                                                                                                                                                                                                                                                                                                                 |
| <b>CT at clinical diagnosis of pneumonitis</b>                                                                                                                                                                                                                                                                                                                                                                                               |                                                                                                                                                                                                                                                                                                                                                                                                                                             |                                                                                                                                                                                                                                                                                                                                                                                              |
| <b><u>Findings:</u></b><br>- Diffuse <b>GGO</b><br>- Diffuse <b>reticular opacities</b><br>- Lower lobe <b>consolidations</b><br>- <b>Traction bronchiectasis</b><br>- <b>Decreased lung volumes</b><br>- <b>Pleural effusions</b><br><b><u>Extent:</u></b><br>- All lobe involved<br><ul style="list-style-type: none"> <li>• 25-50% in upper lungs</li> <li>• &gt;50% in middle lungs</li> <li>• &gt;50% in lower lungs</li> </ul> (Fig.B) | <b><u>Findings:</u></b><br>- Diffuse <b>GGO</b><br>- Diffuse <b>reticular opacities</b><br>- <b>Consolidations</b><br>- <b>Traction bronchiectasis</b><br>- <b>Centrilobular nodularity</b><br>- <b>Decreased lung volumes</b><br><b><u>Extent:</u></b><br>- All lobes involved<br><ul style="list-style-type: none"> <li>• &gt;50% in upper lungs</li> <li>• &gt;50% in middle lungs</li> <li>• &gt;50% in lower lungs</li> </ul> (Fig. C) | <b><u>Findings:</u></b><br>- Peripheral and lower lung <b>GGO</b><br>- Peripheral and lower lung <b>reticular opacities</b><br>- Peripheral and lower lung <b>consolidations</b><br><br><b><u>Extent:</u></b><br>- All lobes involved<br><ul style="list-style-type: none"> <li>• 5-25% of upper lungs</li> <li>• 5-25% of middle lungs</li> <li>• 25-50% of lower lungs</li> </ul> (Fig. D) |
| <b>Radiological Follow-up</b>                                                                                                                                                                                                                                                                                                                                                                                                                |                                                                                                                                                                                                                                                                                                                                                                                                                                             |                                                                                                                                                                                                                                                                                                                                                                                              |
| Marked decrease of all findings at 2 wks and 10 wks after the onset                                                                                                                                                                                                                                                                                                                                                                          | No follow-up CT scan                                                                                                                                                                                                                                                                                                                                                                                                                        | All findings decreased on 3 follow-up scans off therapy; No recurrent pneumonitis on follow-up scans over 39 months since restarting therapy                                                                                                                                                                                                                                                 |
| <b>Classification</b>                                                                                                                                                                                                                                                                                                                                                                                                                        |                                                                                                                                                                                                                                                                                                                                                                                                                                             |                                                                                                                                                                                                                                                                                                                                                                                              |
| <b>AIP/ARDS</b>                                                                                                                                                                                                                                                                                                                                                                                                                              | <b>AIP/ARDS</b>                                                                                                                                                                                                                                                                                                                                                                                                                             | <b>NSIP</b>                                                                                                                                                                                                                                                                                                                                                                                  |

RB-ILD: respiratory bronchitis-interstitial lung disease, which is one of the manifestation of smoking related lung disease

GGOs: ground glass opacity

AIP: acute interstitial pneumonia

ARDS: acute respiratory distress syndrome

NSIP: non-specific interstitial pneumonia
